# Supplementary material for: Epidermal growth factor receptor (EGFR) is transcriptionally induced by the Y-box binding protein-1 (YB-1) and can be inhibited with Iressa in basal-like breast cancer, providing a potential target for therapy
Source: PubMed Central journal article supplement (PMC2242657; doi:10.1186/bcr1767), 2007-09-17
Supplement: bcr1767-S2.pdf [file bcr1767-S2.pdf]

**Table 2 Supplemental****EGFR Variants Detected in SUM149 Cell Line**

| Exon # | Variants         |                        |                | Interpretation                  |
|--------|------------------|------------------------|----------------|---------------------------------|
|        | bp # within exon | bp # within transcript | Amino Acid #   |                                 |
| 1      | A56CC            | A56CC                  | Not translated | SNP: <a href="#">rs712830</a>   |
| 2      | No variants      |                        |                |                                 |
| 3      | No variants      |                        |                |                                 |
| 4      | No variants      |                        |                |                                 |
| 5      | No variants      |                        |                |                                 |
| 6      | No variants      |                        |                |                                 |
| 7      | No variants      |                        |                |                                 |
| 8      | No variants      |                        |                |                                 |
| 9      | No variants      |                        |                |                                 |
| 10     | No variants      |                        |                |                                 |
| 11     | No variants      |                        |                |                                 |
| 12     | A19AG            | A1563AG                | A439A          | SNP: <a href="#">rs17290005</a> |
| 13     | G64AG            | G1808AG                | R521K          | SNP: <a href="#">rs11543848</a> |
| 14     | No variants      |                        |                |                                 |
| 15     | G66AG            | G2034AG                | P596P          | SNP: <a href="#">rs17290162</a> |
| 16     | No variants      |                        |                |                                 |
| 17     | No variants      |                        |                |                                 |
| 18     | No variants      |                        |                |                                 |
| 19     | No variants      |                        |                |                                 |
| 20     | G78AG            | G2607AG                | Q787Q          | SNP: <a href="#">rs17337198</a> |
| 21     | No variants      |                        |                |                                 |
| 22     | No variants      |                        |                |                                 |
| 23     | No variants      |                        |                |                                 |
| 24     | No variants      |                        |                |                                 |
| 25     | No variants      |                        |                |                                 |
| 26     | No variants      |                        |                |                                 |
| 27     | No variants      |                        |                |                                 |
| 28     | No variants      |                        |                |                                 |

These variants can be viewed using Ensembl:

[http://www.ensembl.org/Homo\\_sapiens/transview?db=core;transcript=ENST00000275493](http://www.ensembl.org/Homo_sapiens/transview?db=core;transcript=ENST00000275493)
